# Supplementary material for: Potential effects of adverse childhood experiences on school engagement in youth: a dominance analysis
Source: Springer Nature journal article supplement (doi:10.1186/s12889-022-14524-8), 2022-11-16
Supplement: MOESM1 [file 23718732]

## Potential Effects of Adverse Childhood Experiences on School Engagement in Youth: A Dominance Analysis

Additional File 1: Logistic regression assumption testing: multicollinearity of the explanatory and covariables form model 1 (outcome: repeated grades). Variance Inflation Factor (VIF) determines the correlation between the independent variables. A score close to 1 indicates that there is little correlation while a score close to 10 indicates a large correlation.

| <b>Variable</b>                             | <b>VIF</b> | <b>Tolerance</b> |
|---------------------------------------------|------------|------------------|
| Sex                                         | 1.00       | 0.998            |
| Age                                         | 1.08       | 0.927            |
| Race/Ethnicity                              | 1.03       | 0.966            |
| Minimum Parental Education                  | 1.05       | 0.949            |
| Health Issue                                | 1.06       | 0.946            |
| Hard to cover basics like food or housing   | 1.10       | 0.906            |
| Treated unfairly because of race            | 1.07       | 0.933            |
| Parent or guardian divorce                  | 1.28       | 0.784            |
| Parent or guardian death                    | 1.04       | 0.965            |
| Parent or guardian in jail                  | 1.37       | 0.732            |
| Adults slap, hit, kick, punch others        | 1.40       | 0.717            |
| Victim of violence                          | 1.24       | 0.806            |
| Lived with mentally ill                     | 1.26       | 0.796            |
| Lived with person with alcohol/drug problem | 1.46       | 0.683            |
