# Supplementary material for: Potential effects of adverse childhood experiences on school engagement in youth: a dominance analysis
Source: Springer Nature journal article supplement (doi:10.1186/s12889-022-14524-8), 2022-11-16
Supplement: MOESM2 [file 23718732]

**Potential Effects of Adverse Childhood Experiences on School Engagement in Youth: A Dominance Analysis**

Additional File 2: Unadjusted bivariate analyses for three model outcomes (repeated grades, does all required homework, and cares about doing well in school) by demographic, ACE, and other covariables for the National Survey of Children’s Health 2018-2019.

| Variables | Total by Category<br>n=39,347<br>*<br>%<br>(95% CI)** | Outcome 1: Repeated Grade                                    |                                                                     | p-value | Outcome 2: Does All Required Homework                                 |                                                                          | p-value | Outcome 3: Cares About Doing Well in School                         |                                                                             | p-value |
|-----------|-------------------------------------------------------|--------------------------------------------------------------|---------------------------------------------------------------------|---------|-----------------------------------------------------------------------|--------------------------------------------------------------------------|---------|---------------------------------------------------------------------|-----------------------------------------------------------------------------|---------|
|           |                                                       | Grade Repeated by Category<br>n=2,201*<br>6.3%<br>(95% CI)** | Grade Not Repeated by Category<br>n= 37,146*<br>93.7%<br>(95% CI)** |         | Does All Homework by Category<br>n=34,828<br>*<br>88.7%<br>(95% CI)** | Does Not Do All Homework by Category<br>n=4,519 *<br>11.3%<br>(95% CI)** |         | Cares About School by Category<br>n= 34,851*<br>89.1%<br>(95% CI)** | Does Not Care About School by Category<br>n= 4,496 *<br>10.9%<br>(95% CI)** |         |
| Sex       |                                                       |                                                              |                                                                     |         |                                                                       |                                                                          |         |                                                                     |                                                                             |         |
| Male      | 50.9<br>(49.8, 52.0)                                  | 64.2<br>(59.5, 68.7)                                         | 50.0<br>(48.9, 51.2)                                                | <0.0001 | 48.9<br>(47.8, 50.1)                                                  | 66.7<br>(63.8, 69.6)                                                     | <0.0001 | 48.8<br>(47.7, 50.0)                                                | 68.2<br>(65.3, 70.9)                                                        | <0.0001 |
| Female    | 49.1<br>(48.0, 50.2)                                  | 35.8<br>(31.3, 40.5)                                         | 50.0<br>(48.9, 51.1)                                                |         | 51.1<br>(49.9, 52.3)                                                  | 33.3<br>(30.4, 36.2)                                                     |         | 51.2<br>(50.0, 52.4)                                                | 31.8<br>(29.1, 34.7)                                                        |         |
| Age       |                                                       |                                                              |                                                                     |         |                                                                       |                                                                          |         |                                                                     |                                                                             |         |
| 6-9       | 32.5<br>(31.5, 33.6)                                  | 19.1<br>(16.0, 22.7)                                         | 33.4<br>(32.4, 34.5)                                                | <0.0001 | 33.9<br>(32.8, 35.0)                                                  | 21.9<br>(19.3, 24.8)                                                     | <0.0001 | 33.2<br>(32.1, 34.3)                                                | 26.8<br>(24.1, 29.6)                                                        | <0.0001 |
| 10-13     | 34.2<br>(33.2, 35.2)                                  | 34.9<br>(30.6, 39.5)                                         | 34.1<br>(33.1, 35.2)                                                |         | 34.1<br>(33.0, 35.2)                                                  | 34.6<br>(31.8, 37.5)                                                     |         | 34.2<br>(33.1, 35.3)                                                | 34.4<br>(31.6, 37.2)                                                        |         |

|                            |                      |                      |                      |                      |                      |                      |                      |         |
|----------------------------|----------------------|----------------------|----------------------|----------------------|----------------------|----------------------|----------------------|---------|
| 14-17                      | 33.3<br>(32.3, 34.3) | 46.1<br>(41.3, 50.9) | 32.5<br>(31.5, 33.5) | 32.0<br>(31.0, 33.1) | 43.5<br>(40.5, 46.5) | 32.6<br>(31.6, 33.7) | 38.9<br>(36.0, 41.8) |         |
| Race/Ethnicity             |                      |                      |                      |                      |                      |                      |                      |         |
| White                      | 51.4<br>(50.3, 52.5) | 43.1<br>(38.7, 47.5) | 51.9<br>(50.8, 53.0) | 51.7<br>(50.6, 52.9) | 48.6<br>(45.7, 51.6) | 51.4<br>(50.2, 52.5) | 51.7<br>(48.6, 54.7) |         |
| Black                      | 12.8<br>(12.1, 13.6) | 17.9<br>(14.8, 21.4) | 12.5<br>(11.7, 13.3) | 12.1<br>(11.3, 12.9) | 18.9<br>(16.4, 21.6) | 12.5<br>(11.7, 13.3) | 15.5<br>(13.3, 18.0) |         |
| Hispanic                   | 25.2<br>(24.1, 26.5) | 30.5<br>(25.3, 36.1) | 24.9<br>(23.7, 26.1) | 25.4<br>(24.1, 26.7) | 24.1<br>(21.0, 27.5) | 25.5<br>(24.2, 26.8) | 23.3<br>(20.2, 26.7) | 0.0036  |
| Other                      | 5.1<br>(4.7, 5.5)    | 4.8<br>(3.4, 6.8)    | 5.1<br>(4.7, 5.5)    | 5.0<br>(4.6, 5.4)    | 5.6<br>(4.5, 6.8)    | 5.0<br>(4.5, 5.4)    | 6.0<br>(4.9, 7.2)    |         |
| >=2 or more races          | 5.5<br>(5.1, 5.9)    | 3.8<br>(2.6, 5.4)    | 5.6<br>(5.2, 6.1)    | 5.8<br>(5.4, 6.3)    | 2.8<br>(3.1, 3.7)    | 5.7<br>(5.3, 6.2)    | 3.6<br>(2.6, 4.9)    |         |
| Minimum Parental Education |                      |                      |                      |                      |                      |                      |                      |         |
| Less than high school      | 17.9<br>(16.7, 19.1) | 32.4<br>(27.4, 37.8) | 16.9<br>(15.8, 18.1) | 17.4<br>(16.2, 18.7) | 21.8<br>(18.8, 25.1) | 17.5<br>(16.3, 18.8) | 20.7<br>(17.8, 24.0) |         |
| HS/GED/Vocational          | 29.2<br>(28.2, 30.2) | 36.3<br>(32.0, 40.8) | 28.7<br>(27.7, 29.7) | 28.6<br>(27.6, 29.7) | 33.9<br>(31.1, 36.7) | 28.4<br>(27.4, 29.5) | 35.6<br>(32.8, 38.5) |         |
| Some college               | 22.6<br>(21.8, 23.4) | 17.6<br>(15.2, 20.3) | 22.9<br>(22.1, 23.7) | 22.5<br>(21.6, 23.3) | 23.6<br>(21.4, 25.9) | 22.4<br>(21.6, 23.3) | 24.0<br>(21.8, 26.3) | <0.0001 |
| Bachelor                   | 21.2<br>(20.5, 22.0) | 10.5<br>(8.5, 12.9)  | 21.9<br>(21.2, 22.7) | 22.0<br>(21.2, 22.8) | 15.3<br>(13.4, 17.4) | 22.0<br>(21.2, 22.8) | 14.7<br>(13.1, 16.5) |         |
| Masters or greater         | 9.1<br>(8.6, 9.7)    | 3.2<br>(2.4, 4.4)    | 9.5<br>(9.0, 10.1)   | 9.6<br>(9.1, 10.2)   | 5.5<br>(4.4, 6.9)    | 9.6<br>(9.1, 10.2)   | 5.1<br>(4.2, 6.2)    |         |



|                                      |     |                      |                      |                      |         |                      |                      |         |                      |                      |         |
|--------------------------------------|-----|----------------------|----------------------|----------------------|---------|----------------------|----------------------|---------|----------------------|----------------------|---------|
| Parent or guardian death             | No  | 71.2<br>(70.2, 72.2) | 59.7<br>(55.3, 64.1) | 72.0<br>(71.0, 73.0) | <0.0001 | 73.3<br>(72.3, 74.3) | 55.0<br>(52.0, 58.0) | <0.0001 | 73.1<br>(72.1, 74.1) | 55.7<br>(52.8, 58.7) | <0.0001 |
|                                      | Yes | 28.8<br>(27.8, 29.8) | 40.3<br>(36.0, 44.7) | 28.0<br>(27.0, 29.0) |         | 26.7<br>(25.7, 27.7) | 45.0<br>(42.1, 48.0) |         | 26.9<br>(25.9, 27.9) | 44.3<br>(41.3, 47.3) |         |
| Parent or guardian time in jail      | No  | 96.1<br>(95.7, 96.5) | 91.5<br>(87.9, 94.0) | 96.5<br>(96.1, 96.8) | <0.0001 | 96.4<br>(96.0, 96.8) | 94.0<br>(92.6, 95.2) | <0.0001 | 96.4<br>(96.0, 96.8) | 94.2<br>(92.8, 95.3) | 0.0001  |
|                                      | Yes | 3.9<br>(3.5, 4.3)    | 8.6<br>(6.0, 12.1)   | 3.6<br>(3.2, 3.9)    |         | 3.6<br>(3.2, 4.0)    | 6.0<br>(4.8, 7.4)    |         | 3.6<br>(3.2, 4.0)    | 5.8<br>(4.7, 7.2)    |         |
| Adults slap, hit, kick, punch others | No  | 91.3<br>(90.7, 91.9) | 80.7<br>(77.1, 83.8) | 92.0<br>(91.5, 92.6) | <0.0001 | 92.6<br>(92.0, 93.1) | 81.5<br>(79.0, 93.7) | <0.0001 | 92.4<br>(91.8, 92.9) | 82.8<br>(80.4, 85.0) | <0.0001 |
|                                      | Yes | 8.7<br>(8.1, 9.3)    | 19.3<br>(16.2, 22.9) | 8.0<br>(7.4, 8.6)    |         | 7.4<br>(6.9, 8.0)    | 18.5<br>(16.3, 21.0) |         | 7.6<br>(7.1, 8.2)    | 17.2<br>(15.0, 19.6) |         |
| Victim of Violence                   | No  | 93.2<br>(92.7, 93.8) | 85.3<br>(81.8, 88.2) | 93.8<br>(93.2, 94.3) | <0.0001 | 94.3<br>(93.7, 94.8) | 85.0<br>(82.6, 87.1) | <0.0001 | 94.1<br>(93.5, 94.6) | 86.3<br>(84.1, 88.2) | <0.0001 |
|                                      | Yes | 6.8<br>(6.2, 7.3)    | 14.7<br>(11.8, 18.2) | 6.2<br>(5.7, 6.8)    |         | 5.7<br>(5.2, 6.3)    | 15.0<br>(12.9, 17.4) |         | 5.9<br>(5.4, 6.5)    | 13.7<br>(11.8, 15.9) |         |
|                                      | No  | 94.8<br>(94.3, 95.3) | 89.6<br>(86.9, 91.8) | 95.1<br>(94.6, 95.6) | <0.0001 | 95.8<br>(95.3, 96.3) | 86.7<br>(84.4, 88.6) | <0.0001 | 95.7<br>(95.1, 96.1) | 87.6<br>(85.4, 89.6) | <0.0001 |

|                                             |     |                      |                      |                      |         |                      |                      |                      |                      |         |
|---------------------------------------------|-----|----------------------|----------------------|----------------------|---------|----------------------|----------------------|----------------------|----------------------|---------|
| Lived with mentally ill                     | Yes | 5.2<br>(4.7, 5.7)    | 10.4<br>(8.2, 13.1)  | 4.9<br>(4.4, 5.4)    |         | 4.2<br>(3.7, 4.7)    | 13.3<br>(11.4, 15.6) | 4.4<br>(3.9, 4.9)    | 12.4<br>(10.4, 14.7) |         |
|                                             | No  | 90.4<br>(89.7, 91.0) | 82.0<br>(78.0, 85.5) | 90.9<br>(90.3, 91.5) | <0.0001 | 91.8<br>(91.1, 92.4) | 79.4<br>(77.1, 81.5) | 91.6<br>(90.9, 92.2) | 80.4<br>(78.1, 82.6) | <0.0001 |
| Lived with person with alcohol/drug problem | Yes | 9.6<br>(9.0, 10.3)   | 18.0<br>(14.5, 22.0) | 9.1<br>(8.5, 9.7)    |         | 8.2<br>(7.6, 8.9)    | 20.6<br>(18.5, 22.9) | 8.4<br>(7.8, 9.1)    | 19.6<br>(17.4, 21.9) |         |
|                                             | No  | 89.8<br>(89.1, 90.4) | 82.5<br>(78.2, 86.1) | 90.2<br>(89.6, 90.9) | <0.0001 | 90.9<br>(90.2, 91.5) | 80.9<br>(78.8, 83.0) | 90.9<br>(90.2, 91.5) | 80.7<br>(78.3, 82.8) | <0.0001 |
|                                             | Yes | 10.2<br>(9.6, 10.9)  | 17.5<br>(13.9, 21.8) | 9.8<br>(9.1, 10.4)   |         | 9.1<br>(8.5, 9.8)    | 19.1<br>(17.1, 21.3) | 9.1<br>(8.5, 9.8)    | 19.3<br>(17.2, 21.7) |         |

\*Unweighted NSCH population size

\*\*Weighted percentage and 95% confidence interval
